# Supplementary material for: Diversity, Dynamics and Therapeutic Application of Clostridioides difficile Bacteriophages
Source: MDPI journal article supplement (doi:10.3390/v14122772), 2022-12-12
Supplement: s1 [file s1]

**Table S1.** Phages included in the phage cloud analysis shown in Figure 1.

|    | name                               | accession | cloud |
|----|------------------------------------|-----------|-------|
| 1  | Clostridium phage phiMMP02         | JX145341  | 1     |
| 2  | Clostridium phage phiMMP04         | JX145342  | 1     |
| 3  | Clostridium phage phiMMP01         | LN681541  | 1     |
| 4  | Clostridium phage phiCDHM14        | LK985321  | 1     |
| 5  | Clostridium phage phiCD505         | LN681539  | 1     |
| 6  | Clostridium phage CDKM9            | KX228399  | 1     |
| 7  | Clostridium phage CDKM15           | KX228400  | 1     |
| 8  | Clostridium virus phiCD27          | EU719189  | 1     |
| 9  | Clostridium virus phiCD27 NC       | 011398    | 1     |
| 10 | Clostridium phage phiMMP03         | LN681542  | 1     |
| 11 | Clostridium virus phiCD119         | AY855346  | 1     |
| 12 | Clostridium virus phiCD119 NC      | 007917    | 1     |
| 13 | Clostridium phage phiCDHM19        | LK985322  | 1     |
| 14 | Clostridium phage CDMH1            | HG531805  | 1     |
| 15 | Clostridium virus phiC2            | DQ466086  | 1     |
| 16 | Clostridium virus phiC2 NC         | 009231    | 1     |
| 17 | Clostridium phage phiCD506         | LN681540  | 1     |
| 18 | Clostridium phage phiCDHM13        | HG796225  | 1     |
| 19 | Clostridium phage JD032            | MK473382  | 1     |
| 20 | Clostridium phage phiCD481-1       | LN681538  | 1     |
| 21 | Clostridium phage phiCDHM11        | HG798901  | 1     |
| 22 | Clostridium phage phiZP2           | JQ729992  | 2     |
| 23 | Clostridium phage CPQ7             | MZ401007  | 2     |
| 24 | Clostridium phage CPS2             | MH248069  | 2     |
| 25 | Clostridium phage CPQ1             | MW057920  | 2     |
| 26 | Clostridium phage phiCP7R          | JQ729990  | 2     |
| 27 | Clostridium phage CPQ9             | MZ401008  | 2     |
| 28 | Clostridium phage CPQ10            | MZ401009  | 2     |
| 29 | Clostridium phage CPQ3             | MZ401005  | 2     |
| 30 | Clostridium phage phiCPV4          | JQ729991  | 2     |
| 31 | Clostridium phage phiCP26F         | GQ443085  | 3     |
| 32 | Clostridium phage phiCP34O         | JF767209  | 3     |
| 33 | Clostridium phage phiCP39-O        | EU588980  | 3     |
| 34 | Clostridium phage vB CpeP<br>PMQ04 | MZ995505  | 3     |
| 35 | Clostridium phage phiCP9O          | JF767210  | 3     |
| 36 | Clostridium phage phiCP13O         | JF767208  | 3     |
| 37 | Clostridium phage CPQ4             | MZ401006  | 3     |
| 38 | Clostridium phage CPD1             | MH999280  | 3     |
| 39 | Clostridium phage CPD4             | MK017819  | 4     |
| 40 | Clostridium phage CP3              | MF001357  | 4     |
| 41 | Clostridium phage CPAS-15          | MN417334  | 4     |

|    |                                     |              |    |
|----|-------------------------------------|--------------|----|
| 42 | Clostridium phage Clo-PEP-1         | KY206887     | 4  |
| 43 | Clostridium phage phiCT9441A        | KM983329     | 5  |
| 44 | Clostridium phage phiCT19406A       | KM983330     | 5  |
| 45 | Clostridium phage phiCT453A         | KM983327     | 5  |
| 46 | Clostridium phage phiCTC2A          | KM983333     | 5  |
| 47 | Clostridium phage phiCD111          | LN681535     | 6  |
| 48 | Clostridium phage phiCD146          | LN681536     | 6  |
| 49 | Clostridium phage CDSH1             | KU057941     | 6  |
| 50 | Clostridium phage phiCD38-2         | HM568888     | 6  |
| 51 | Clostridium phage CPS1              | KY996523     | 7  |
| 52 | Clostridium phage vB CpeP<br>HN02   | MW815121     | 7  |
| 53 | Clostridium phage CPD2              | MH999279     | 7  |
| 54 | Clostridium phage phi24R            | JN800508     | 7  |
| 55 | Clostridium phage phiCD211          | LN681537     | 8  |
| 56 | Clostridioides phage LIBA2945       | MF547663     | 8  |
| 57 | Clostridioides phage LIBA6276       | MF547662     | 8  |
| 58 | Clostridium phage phiCT453B         | KM983328     | 9  |
| 59 | Clostridium phage phiCTC2B          | KM983334     | 9  |
| 60 | Clostridium phage phiCT19406B       | KM983331     | 9  |
| 61 | Clostridium phage c-st              | AP008983     | 10 |
| 62 | Clostridium phage D-1873            | ACSJ01000000 | 10 |
| 63 | Clostridium phage phiCD24-1         | LN681534     | 11 |
| 64 | Clostridium phage phiCDKH01         | MN718463     | 11 |
| 65 | Clostridium phage phi3626 NC        | 003524       | 12 |
| 66 | Clostridium phage phi3626           | AY082070     | 12 |
| 67 | Clostridium phage susfortuna        | MH393889     | 13 |
| 68 | Clostridium phage CPD7              | MK017820     | 13 |
| 69 | Clostridium phage vB CpeS-CP51      | KC237729     | 14 |
| 70 | Clostridium phage phiCT19406C       | KM983332     | 15 |
| 71 | Clostridium phage PhiS63            | JQ660954     | 16 |
| 72 | Clostridium phage phiSM101          | CP000315     | 17 |
| 73 | Clostridium phage phiCTP1           | HM159959     | 18 |
| 74 | Clostridium phage HM T              | KU517658     | 19 |
| 75 | Clostridium phage CWou-2020a        | CP063964     | 20 |
| 76 | Clostridium phage CpV1              | HM640230     | 21 |
| 77 | Clostridium phage HM2               | LT600745     | 22 |
| 78 | Clostridium phage phi8074-B1        | JQ246028     | 23 |
| 79 | Prokaryotic dsDNA virus sp          | MK892507     | 24 |
| 80 | Clostridium phage phiCD6356         | GU949551     | 25 |
| 81 | Clostridioides phage<br>phiSemix9P1 | KX905163     | 26 |
| 82 | Clostridium phage CWou-2020b        | CP063968     | 27 |
